# Supplementary material for: Estimation of Arterial Carbon Dioxide Based on End-Tidal Gas Pressure and Oxygen Saturation
Source: PubMed Central journal article supplement (PMC6162395; doi:10.3390/jcm7090290), 2018-09-19
Supplement: jcm-07-00290-s001.pdf [file jcm-07-00290-s001.pdf]

## SUPPLEMENTARY MATERIAL

# Estimation of arterial carbon dioxide based on end-tidal gas pressure and oxygen saturation

Raisa Rentola <sup>1</sup>, Johanna Hästbacka <sup>1</sup>, Erkki Heinonen <sup>2</sup>, Per H Rosenberg <sup>3</sup>,

Tom Häggblom <sup>2</sup>, and Markus B Skrifvars <sup>1,\*</sup>

<sup>1</sup> Division of Intensive Care, Department of Anaesthesiology, Intensive Care and Pain Medicine, Helsinki University Hospital and University of Helsinki, Helsinki 00290, Finland; raisa.rentola@hus.fi; johanna.hastbacka@hus.fi

<sup>2</sup> Clinical Care Solutions, Anaesthesia and Respiratory Care, Helsinki 00510, GE Healthcare Finland OY; erkki.heinonen@ge.com; tom.haggblom@ge.com

<sup>3</sup> Division of Anaesthesia, Department of Anaesthesiology, Intensive Care and Pain Medicine, Helsinki University Hospital and University of Helsinki, Helsinki 00290 Finland; per.rosenberg@helsinki.fi

\* Correspondence: markus.skrifvars@hus.fi; Tel.: +358504272424

Figure S1. The flowchart of experimental protocol.

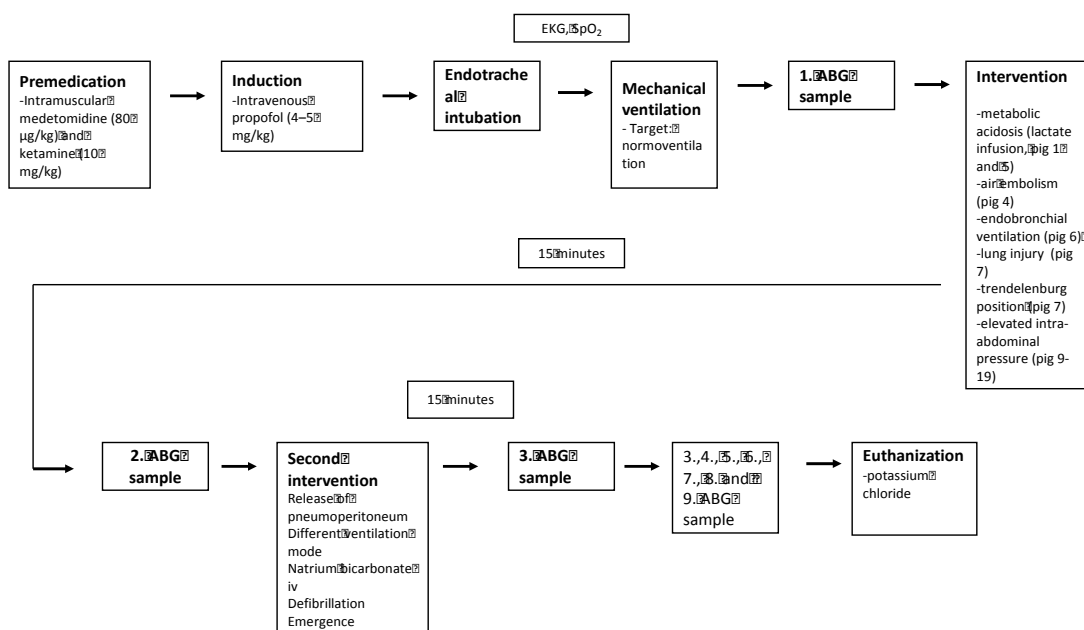

Figure S2a. The Bland-Altman plot demonstrating the difference between estimated PaCO<sub>2</sub> (Formula 1) and measured PaCO<sub>2</sub> with 95% confidence intervals in animals 9-19.

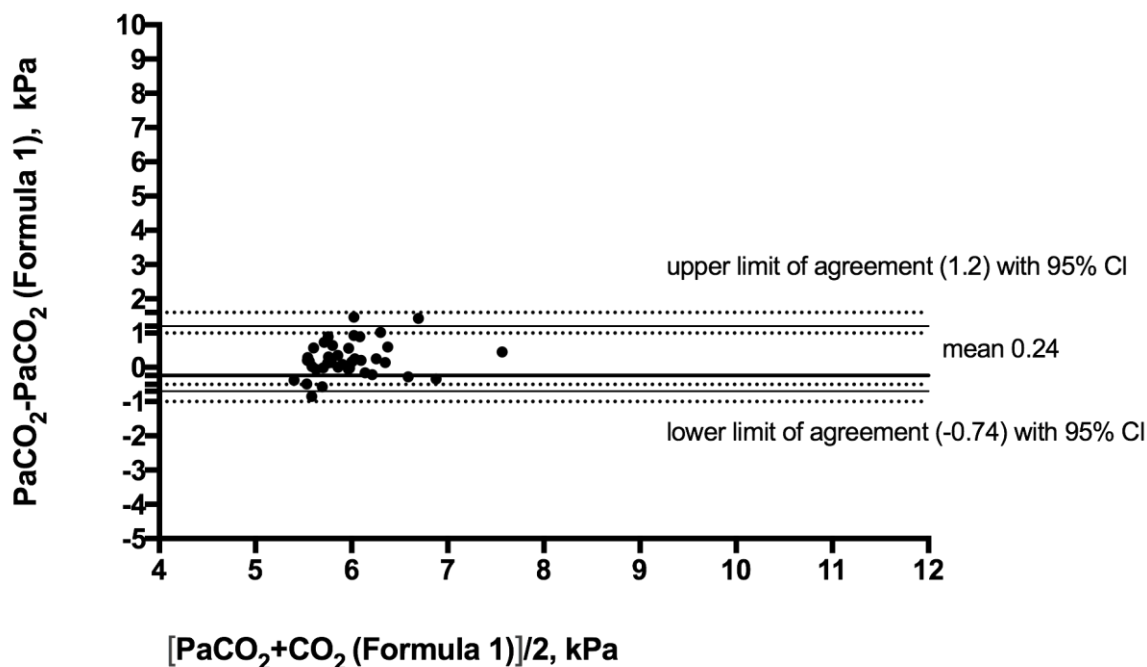

Figure S2b. The Bland-Altman plot demonstrating the difference between estimated PaCO<sub>2</sub> (Formula 2) and measured PaCO<sub>2</sub> with 95% confidence intervals in animals 9-19.

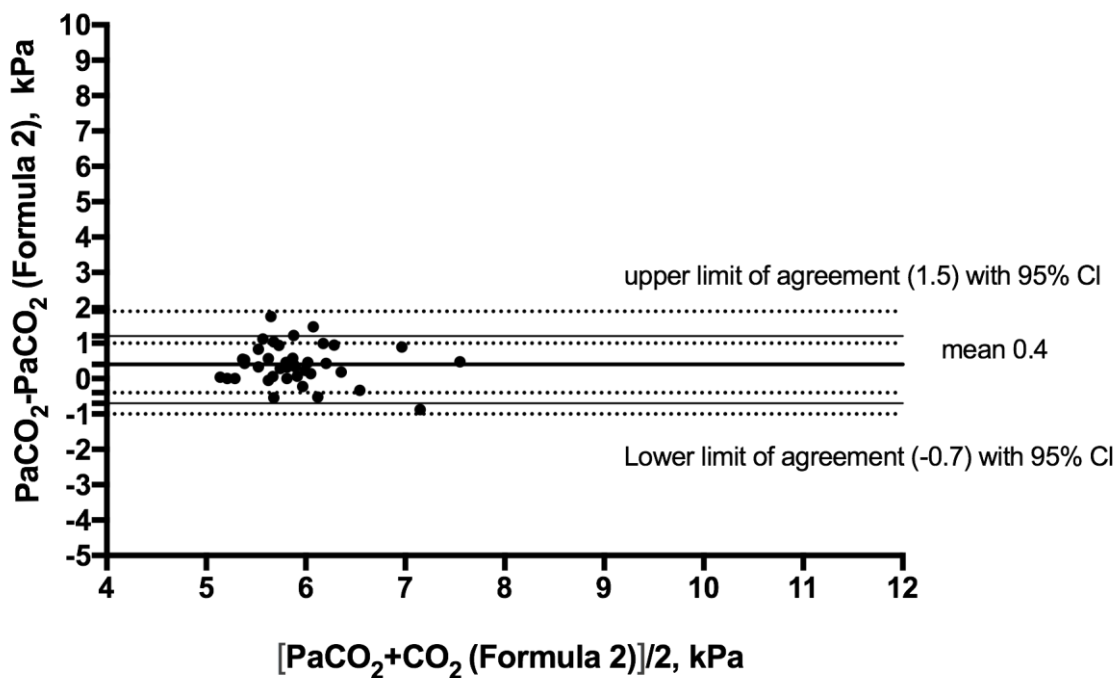

Figure S3. The differences between measured PaCO<sub>2</sub> and end-tidal CO<sub>2</sub> values at each time point.

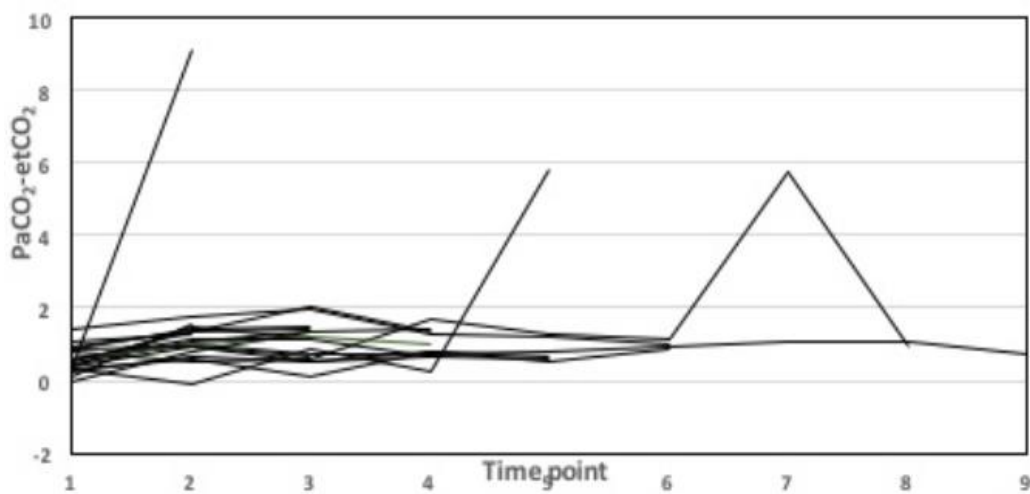

Figure S4. The Bland-Altman plot demonstrating the difference between measured PaCO<sub>2</sub> and end-tidal carbon dioxide (ETCO<sub>2</sub>) with 95% confidence intervals.

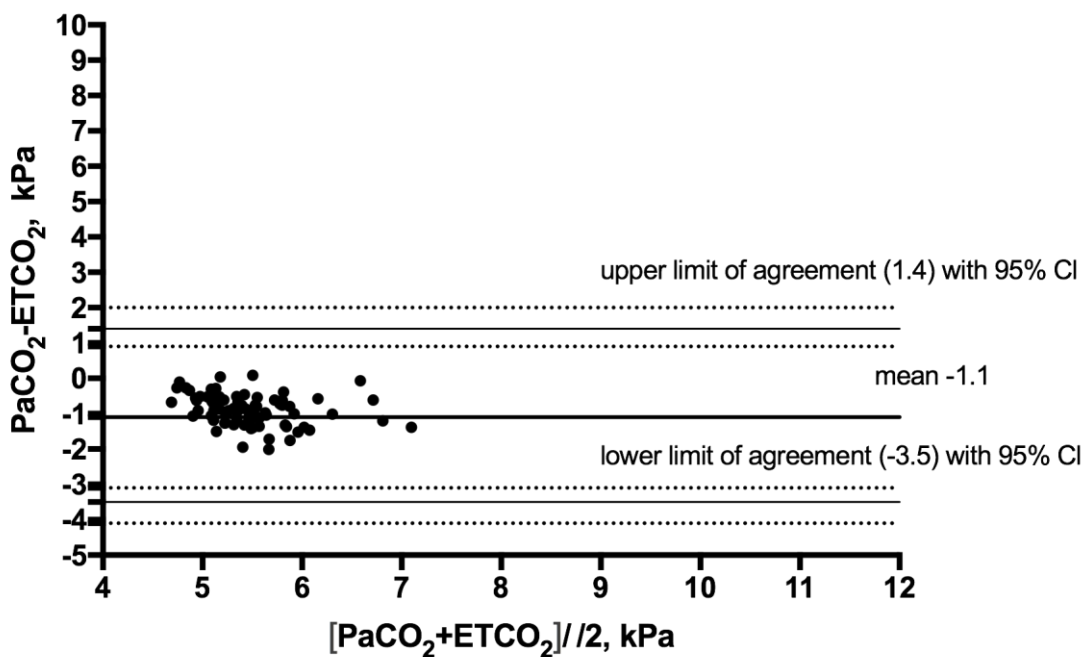

Figure S5a. The Bland-Altman plot demonstrating the difference between estimated PaCO<sub>2</sub> (Formula 1) and paCO<sub>2</sub> with 95% confidence intervals in 26 cases prior to any intervention aiming at modifying CO<sub>2</sub>.

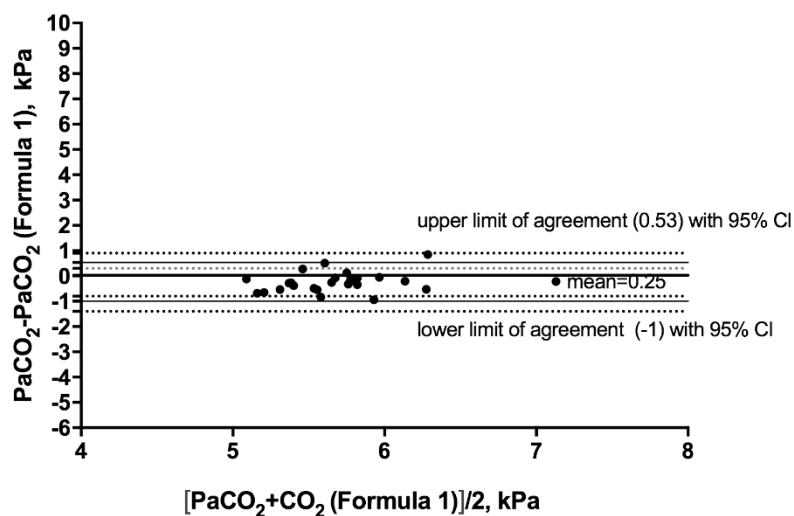

Figure S5b. The Bland-Altman plot demonstrating the difference between end-tidal carbon dioxide (ETCO<sub>2</sub>) and paCO<sub>2</sub> with 95% confidence intervals in 26 cases prior to any intervention aiming at modifying CO<sub>2</sub>.

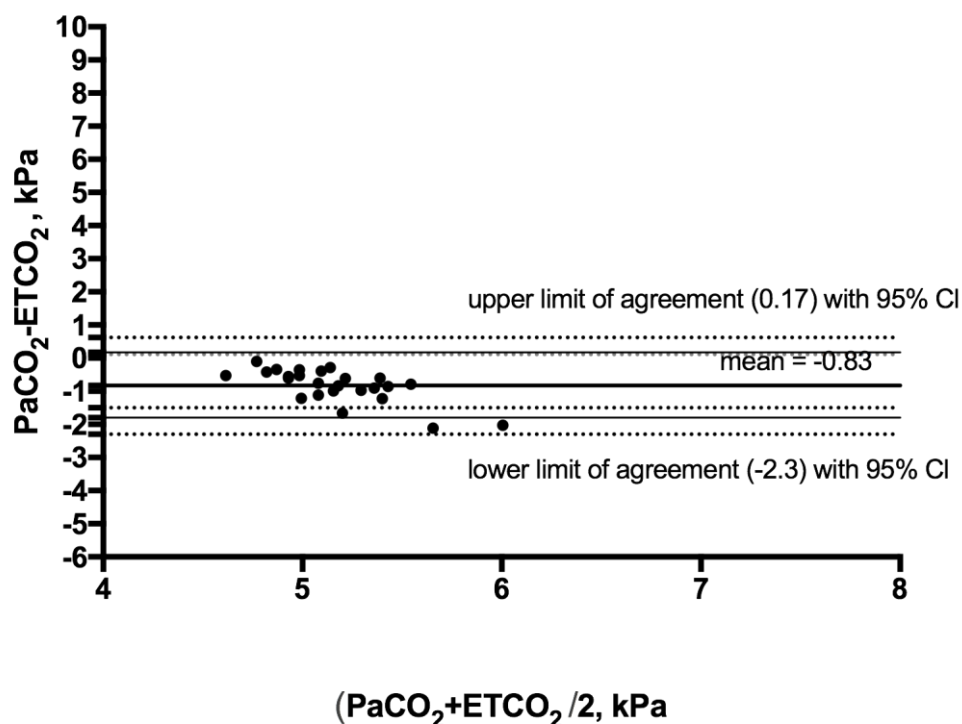

**Table S1.** Weight, interventions performed, number of ABG analyses, values of measured PaCO<sub>2</sub> and pH values in the study subjects. The numbering of animals are based on timing, with the first experimental animal labelled number one and the last number nineteen.

| Cas<br>e<br>no. | Weigh<br>t<br>(kg) | Intervention                     | No. of<br>ABG<br>analyse<br>s | Lowest<br>PaCO <sub>2</sub><br>,<br>kPa | Highest<br>,<br>PaCO <sub>2</sub> ,<br>kPa | Mean<br>PaCO <sub>2</sub><br>,<br>kPa | Highest<br>pH | Lowest<br>PH | Mean<br>pH |
|-----------------|--------------------|----------------------------------|-------------------------------|-----------------------------------------|--------------------------------------------|---------------------------------------|---------------|--------------|------------|
| 1               | 34                 | Metabolic acidosis               | 2                             | 5.24                                    | 9.85                                       | 7.55                                  | 7.48          | 7.19         | 7.34       |
| 2               | 37                 | Metabolic alkalosis              | 10                            | 4.92                                    | 6.81                                       | 6.21                                  | 7.66          | 7.36         | 7.53       |
| 3               | 29                 | CPR+defibrillation               | 2                             | 4.82                                    | 6.72                                       | 5.77                                  | 7.47          | 7.33         | 7.40       |
| 4               | 30                 | Air embolism*                    | 9                             | 5.43                                    | 10.55                                      | 6.75                                  | 7.52          | 7.20         | 7.44       |
| 5               | 17,5               | Metabolic acidosis               | 4                             | 4.97                                    | 5.74                                       | 5.30                                  | 7.60          | 7.35         | 7.44       |
| 6               | 17,5               | Left lung blocked**              | 5                             | 5.28                                    | 7.02                                       | 6.13                                  | 7.49          | 7.40         | 7.44       |
| 7               | 46,5               | Trendelenburg+NaCl***            | 5                             | 5.31                                    | 6.27                                       | 5.74                                  | 7.48          | 7.42         | 7.47       |
| 8               | 31                 | Emergence                        | 4                             | 4.88                                    | 5.25                                       | 5.10                                  | 7.55          | 7.47         | 7.52       |
| 9               | 27                 | CO <sub>2</sub> insufflation**** | 5                             | 5.29                                    | 6.81                                       | 6.14                                  | 7.41          | 7.50         | 7.47       |
| 10              | 25                 | CO <sub>2</sub> insufflation     | 4                             | 5.16                                    | 6.53                                       | 5.96                                  | 7.48          | 7.41         | 7.43       |
| 11              | 19                 | CO <sub>2</sub> insufflation     | 3                             | 5.65                                    | 6.16                                       | 5.93                                  | 7.46          | 7.43         | 7.45       |
| 12              | 23                 | CO <sub>2</sub> insufflation     | 4                             | 5.64                                    | 6.42                                       | 5.95                                  | 7.50          | 7.46         | 7.48       |
| 13              | 21                 | CO <sub>2</sub> insufflation     | 4                             | 5.6                                     | 6.67                                       | 6.21                                  | 7.44          | 7.39         | 7.41       |
| 14              | 26                 | CO <sub>2</sub> insufflation     | 3                             | 5.21                                    | 6.13                                       | 5.75                                  | 7.82          | 7.49         | 7.50       |
| 15              | 15,5               | CO <sub>2</sub> insufflation     | 4                             | 5.81                                    | 13.75                                      | 8.40                                  | 7.50          | 7.18         | 7.44       |
| 16              | 25                 | CO <sub>2</sub> insufflation     | 3                             | 5.86                                    | 6.08                                       | 5.94                                  | 7.50          | 7.49         | 7.49       |
| 17              | 47                 | CO <sub>2</sub> insufflation     | 3                             | 5.41                                    | 5.95                                       | 5.68                                  | 7.53          | 7.51         | 7.52       |
| 18              | 25                 | CO <sub>2</sub> insufflation     | 3                             | 5.6                                     | 6.2                                        | 5.88                                  | 7.53          | 7.50         | 7.52       |
| 19              | 51                 | CO <sub>2</sub> insufflation     | 6                             | 5.86                                    | 7.41                                       | 6.54                                  | 7.52          | 7.44         | 7.49       |

ABG analysis= arterial blood gas analysis, CPR = cardiopulmonary resuscitation, PaCO<sub>2</sub>= arterial partial pressure of carbon dioxide

\*Air embolism: injection of 60 ml of air into the central vein \*\* left lung blocked by placing a Swanz catheter in the left bronchus \*\*\*400 ml of sodium chloride infused into lungs, \*\*\*\*CO<sub>2</sub> insufflation (15 mmHg) to abdominal cavity for simulation of laparoscopic operation

Data about study subjects: weight, interventions, number of ABG analyses, lowest measured arterial partial pressure of carbon dioxide (PaCO<sub>2</sub>) value, highest measured PaCO<sub>2</sub> value, mean of measured PaCO<sub>2</sub> values, highest measured potential of hydrogen (pH) value, lowest measured pH value, mean of measured pH values.

**Table S2.** Hemodynamic variables, etCO<sub>2</sub>, etO<sub>2</sub>, PaO<sub>2</sub> and PaO<sub>2</sub>/FiO<sub>2</sub> ratios of each animal during the experiment.

|    | <i>PETCO<sub>2</sub></i><br>(kPa),<br>Median<br>(IQR) | <i>PETO<sub>2</sub></i><br>(kPa),<br>Median<br>(IQR) | <i>PaO<sub>2</sub></i><br>(kPa),<br>Median | <i>HR</i> ,<br>Median<br>(IQR) | <i>MAP</i><br>(mmHg),<br>Median<br>(IQR) | <i>PaO<sub>2</sub>/FiO<sub>2</sub></i><br>Ratio,<br>Mean | <i>FiO<sub>2</sub> %</i> ,<br>Median<br>(IQR) | <i>PEEP</i> ,<br>(cmH <sub>2</sub> O)<br>Median<br>(IQR) |
|----|-------------------------------------------------------|------------------------------------------------------|--------------------------------------------|--------------------------------|------------------------------------------|----------------------------------------------------------|-----------------------------------------------|----------------------------------------------------------|
| 1  | 5.37 (4.9-6.1)                                        | 33.9 (23.7-42.7)                                     | 10.05                                      | 119 (115-122)                  | 116 (107-122)                            | 248                                                      | 36 (30-43)                                    | 2 (1-2)                                                  |
| 2  | 5.31 (4.9-5.73)                                       | 32.0 (31.8-32.6)                                     | 24.51                                      | 116 (112-122)                  | 93(77-107)                               | 462                                                      | 36 (36-37)                                    | 2 (2-3)                                                  |
| 3  | 4.95 (3.18-5.05)                                      | 29 (25.4-65.1)                                       | 24.92                                      | 118 (111-130)                  | 85 (10-93)                               | 553                                                      | 32 (30-66)                                    | 2 (2-3)                                                  |
| 4  | 5.04 (4.94-5.13)                                      | 37.63 (36.7-42.4)                                    | 8.95                                       | 115 (109-141)                  | 93 (87-105)                              | 277                                                      | 42 (41-46)                                    | 5 (3-12)                                                 |
| 5  | 5 (4.71-5.34)                                         | 33.4 (33.1-48.9)                                     | 28.61                                      | 117 (113-124)                  | 51 (40-74)                               | 554                                                      | 38 (37-53)                                    | 3 (2-5)                                                  |
| 6  | 5.68 (5.14-6.22)                                      | 34 (33.7-34.25)                                      | 24.40                                      | 139 (138-141)                  | 125 (114-132)                            | 650                                                      | 39 (39-40)                                    | 2 (1-2)                                                  |
| 7  | 4.98 (4.89-5.29)                                      | 35.5 (35.2-36.1)                                     | 27.16                                      | 96 (92-100)                    | 89 (83-103)                              | 475                                                      | 40 (40-40)                                    | 8 (2-9)                                                  |
| 8  | 5.02 (4.93-5.13)                                      | 35.2 (35-35.4)                                       | 27.61                                      | 106 (103-109)                  | 88 (81-109)                              | 516                                                      | 35 (35-35)                                    | 2 (2-2)                                                  |
| 9  | 5.01 (4.96-5.25)                                      | 40.1 (36.6-40.8)                                     | 32.53                                      | 139 (136-140)                  | 131 (129-134)                            | 430                                                      | 44 (44-45)                                    | 2 (2-2)                                                  |
| 10 | 5.16                                                  | 34.4 (34.1-34.9)                                     | 26.23                                      | 126 (126-139)                  | 98 (89-103)                              | 543                                                      | 39 (39-39)                                    | 5 (2-5)                                                  |
| 11 | 5.38 (5.24-5.45)                                      | 29.6 (29.4-29.9)                                     | 23.32                                      | 126 (117-130)                  | 94 (87-109)                              | 527                                                      | 34 (34-34)                                    | 5 (5-5)                                                  |
| 12 | 5.45 (5.2-6.02)                                       | 25.23 (24.2-26.3)                                    | 24.49                                      | 105 (99-115)                   | 89 (81-105)                              | 500                                                      | 30 (29-32)                                    | 5 (4-5)                                                  |
| 13 | 5.1 (4.9-5.3)                                         | 24.9 (24.6-25.1)                                     | 16.25                                      | 95 (90-100)                    | 85 (77-92)                               | 437                                                      | 29 (29-30)                                    | 5 (4-5)                                                  |
| 14 | 5.12 (4.9-5.3)                                        | 30.1 (29.7-30.5)                                     | 23.10                                      | 120 (108-127)                  | 91 (74-116)                              | 491                                                      | 35 (34-35)                                    | 5 (5-5)                                                  |
| 15 | 5.39 (5.09-6.7)                                       | 25.2 (24.3-26.3)                                     | 18.28                                      | 92 (85-117)                    | 89 (79-95)                               | 482                                                      | 31 (30-33)                                    | 5 (5-6)                                                  |
| 16 | 5.22 (4.94-5.29)                                      | 24.8 (24.5-25.1)                                     | 18.55                                      | 127 (117-146)                  | 84(76-99)                                | 483                                                      | 29 (28-29)                                    | 5 (2-5)                                                  |
| 17 | 5.22 (4.96-5.33)                                      | 25.9 (25.0-26.2)                                     | 19.68                                      | 120 (120-136)                  | 91 (78-101)                              | 481                                                      | 31 (30-31)                                    | 5 (5-6)                                                  |
| 18 | 5.12 (5.04-5.27)                                      | 25.0 (24.9-25.3)                                     | 18.67                                      | 113 (106-130)                  | 76 (74-85)                               | 493                                                      | 29 (29-30)                                    | 5 (5-5)                                                  |

|    |      |                  |       |             |              |     |            |         |
|----|------|------------------|-------|-------------|--------------|-----|------------|---------|
| 19 | 5.07 | 33.5 (25.1-48.8) | 26.00 | 95 (93-104) | 104 (93-113) | 548 | 38 (29-52) | 8 (6-8) |
|----|------|------------------|-------|-------------|--------------|-----|------------|---------|

etCO<sub>2</sub> = end-tidal carbon dioxide; etO<sub>2</sub> = end-tidal oxygen; PaO<sub>2</sub> = arterial partial pressure of oxygen; HR = heart rate; MAP = mean arterial pressure; FiO<sub>2</sub> = fraction of inspired oxygen; PEEP= positive end-expiratory pressure.

**Table S3.** Estimation of PaO<sub>2</sub> based on values of oxygen-dissociation curve.

| SpO <sub>2</sub> (%) | PaO <sub>2</sub> (kPa) | SpO <sub>2</sub> (%) <sup>2</sup> | PaO <sub>2</sub> (kPa) |
|----------------------|------------------------|-----------------------------------|------------------------|
| 50                   | 3,6                    | 76                                | 5,49                   |
| 51                   | 3,66                   | 77                                | 5,6                    |
| 52                   | 3,71                   | 78                                | 5,71                   |
| 53                   | 3,76                   | 79                                | 5,82                   |
| 54                   | 3,82                   | 80                                | 5,92                   |
| 55                   | 3,87                   | 81                                | 6,05                   |
| 56                   | 3,93                   | 82                                | 6,22                   |
| 57                   | 3,98                   | 83                                | 6,38                   |
| 58                   | 4,04                   | 84                                | 6,55                   |
| 59                   | 4,11                   | 85                                | 6,72                   |
| 60                   | 4,19                   | 86                                | 6,88                   |
| 61                   | 4,26                   | 87                                | 7,08                   |
| 62                   | 4,33                   | 88                                | 7,33                   |
| 63                   | 4,4                    | 89                                | 7,59                   |
| 64                   | 4,47                   | 90                                | 7,85                   |
| 65                   | 4,54                   | 91                                | 8,16                   |
| 66                   | 4,61                   | 92                                | 8,56                   |
| 67                   | 4,69                   | 93                                | 8,96                   |
| 68                   | 4,76                   | 94                                | 9,5                    |
| 69                   | 4,83                   | 95                                | 10,08                  |
| 70                   | 4,9                    | 96                                | 10,92                  |
| 71                   | 4,97                   | 97                                | 12,14                  |
| 72                   | 5,06                   | 98                                | 14                     |
| 73                   | 5,17                   | 99                                | 15,43                  |
| 74                   | 5,28                   | 100                               | 24                     |
| 75                   | 5,39                   |                                   |                        |
